# Supplementary material for: Towards a component-based system model to improve the quality of highly configurable systems
Source: PeerJ Comput Sci. 2022 Mar 7;8:e912. doi: 10.7717/peerj-cs.912 (PMC9044257; doi:10.7717/peerj-cs.912)
Supplement: Supplemental Information 4 [file peerj-cs-08-912-s004.xlsx]

## Sheet: Untitled form (Responses) - For
Timestamp	Email Address	Phone Number (Optional)	Who are you?	How much it was easy to understand, execute and complete application requirements engineering process?	How much it was easy to understand, execute and complete common reference architecture?	How much it was easy to understand, execute and complete variations and commonalities identification?	How much it was easy to understand, execute and complete component selection?	How much it was easy to understand, execute and complete dependency evaluation?	How much it was easy to understand, execute and complete selection of suited components?	How much it was easy to understand, execute and complete component testing?	How much it was easy to understand, execute and complete test suit repository?	How much it was easy to understand, execute and complete documentation process?	How much complexity is reduced for the maintenance of the product using variations and commonalities identification?	How much complexity is reduced for the maintenance of the product using component selection?	How much complexity is reduced for the maintenance of the product using component selection dependency evaluation?
2021-07-26 22:45:00			Industrial Engineer	4 (Below average )	3 (Average)	4 (Below average )	4 (Below average )	4 (Below average )	4 (Below average )	4 (Below average )	4 (Below average )	4 (Below average )	4 (Below average )	2 (Above Average)	4 (Below average )
2021-07-26 22:46:00			Industrial Engineer	2 (Above Average)	2 (Above Average)	3 (Average)	3 (Average)	3 (Average)	3 (Average)	3 (Average)	4 (Below average )	4 (Below average )	4 (Below average )	3 (Average)	3 (Average)
2021-07-26 22:47:00			Industrial Engineer	3 (Average)	2 (Above Average)	2 (Above Average)	3 (Average)	2 (Above Average)	3 (Average)	4 (Below average )	3 (Average)	4 (Below average )	2 (Above Average)	2 (Above Average)	3 (Average)
2021-07-26 22:48:00			Industrial Engineer	2 (Above Average)	2 (Above Average)	1 (Best)	2 (Above Average)	2 (Above Average)	1 (Best)	2 (Above Average)	3 (Average)	1 (Best)	1 (Best)	2 (Above Average)	2 (Above Average)
2021-07-26 22:48:00			Industrial Engineer	2 (Above Average)	1 (Best)	3 (Average)	1 (Best)	3 (Average)	3 (Average)	1 (Best)	2 (Above Average)	2 (Above Average)	2 (Above Average)	1 (Best)	1 (Best)
2021-07-26 22:51:00			Student	1 (Best)	2 (Above Average)	1 (Best)	2 (Above Average)	2 (Above Average)	2 (Above Average)	1 (Best)	1 (Best)	1 (Best)	2 (Above Average)	1 (Best)	1 (Best)
2021-07-26 22:53:00			Student	3 (Average)	3 (Average)	2 (Above Average)	2 (Above Average)	2 (Above Average)	2 (Above Average)	2 (Above Average)	3 (Average)	2 (Above Average)	2 (Above Average)	2 (Above Average)	3 (Average)
2021-07-26 22:54:00			Industrial Engineer	3 (Average)	4 (Below average )	4 (Below average )	2 (Above Average)	2 (Above Average)	2 (Above Average)	3 (Average)	4 (Below average )	3 (Average)	2 (Above Average)	4 (Below average )	2 (Above Average)
2021-07-26 22:57:00			Industrial Engineer	1 (Best)	1 (Best)	1 (Best)	1 (Best)	1 (Best)	1 (Best)	1 (Best)	1 (Best)	1 (Best)	1 (Best)	1 (Best)	1 (Best)
2021-07-26 22:58:00			Student	2 (Above Average)	3 (Average)	4 (Below average )	2 (Above Average)	2 (Above Average)	2 (Above Average)	2 (Above Average)	2 (Above Average)	1 (Best)	1 (Best)	1 (Best)	1 (Best)
2021-07-26 22:58:00			Student	4 (Below average )	3 (Average)	2 (Above Average)	3 (Average)	2 (Above Average)	1 (Best)	1 (Best)	1 (Best)	1 (Best)	2 (Above Average)	3 (Average)	2 (Above Average)
2021-07-26 23:00:00			Industrial Engineer	2 (Above Average)	2 (Above Average)	3 (Average)	3 (Average)	3 (Average)	3 (Average)	3 (Average)	2 (Above Average)	2 (Above Average)	3 (Average)	2 (Above Average)	2 (Above Average)
2021-07-26 23:01:00			Student	3 (Average)	3 (Average)	2 (Above Average)	2 (Above Average)	3 (Average)	2 (Above Average)	3 (Average)	2 (Above Average)	3 (Average)	3 (Average)	3 (Average)	3 (Average)
2021-07-26 23:04:00			Student	3 (Average)	3 (Average)	3 (Average)	3 (Average)	2 (Above Average)	2 (Above Average)	4 (Below average )	3 (Average)	2 (Above Average)	3 (Average)	2 (Above Average)	1 (Best)
2021-07-26 23:08:00			Student	3 (Average)	4 (Below average )	3 (Average)	4 (Below average )	3 (Average)	3 (Average)	2 (Above Average)	3 (Average)	1 (Best)	3 (Average)	2 (Above Average)	3 (Average)
2021-07-26 23:09:00			Industrial Engineer	4 (Below average )	2 (Above Average)	2 (Above Average)	2 (Above Average)	1 (Best)	2 (Above Average)	1 (Best)	1 (Best)	2 (Above Average)	2 (Above Average)	1 (Best)	2 (Above Average)
2021-07-26 23:09:00			Industrial Engineer	4 (Below average )	3 (Average)	2 (Above Average)	1 (Best)	4 (Below average )	1 (Best)	2 (Above Average)	5 (Worst)	4 (Below average )	3 (Average)	1 (Best)	2 (Above Average)
2021-07-26 23:13:00			Student	3 (Average)	3 (Average)	2 (Above Average)	4 (Below average )	4 (Below average )	3 (Average)	2 (Above Average)	3 (Average)	3 (Average)	4 (Below average )	4 (Below average )	4 (Below average )
2021-07-26 23:18:00			Industrial Engineer	2 (Above Average)	2 (Above Average)	2 (Above Average)	1 (Best)	1 (Best)	3 (Average)	1 (Best)	1 (Best)	1 (Best)	2 (Above Average)	1 (Best)	3 (Average)
2021-07-26 23:22:00			Student	3 (Average)	2 (Above Average)	2 (Above Average)	1 (Best)	1 (Best)	3 (Average)	3 (Average)	3 (Average)	3 (Average)	2 (Above Average)	1 (Best)	2 (Above Average)
2021-07-26 23:23:00			Student	2 (Above Average)	2 (Above Average)	2 (Above Average)	2 (Above Average)	2 (Above Average)	2 (Above Average)	2 (Above Average)	2 (Above Average)	2 (Above Average)	2 (Above Average)	2 (Above Average)	2 (Above Average)
2021-07-26 23:27:00			Industrial Engineer	2 (Above Average)	2 (Above Average)	2 (Above Average)	2 (Above Average)	2 (Above Average)	2 (Above Average)	3 (Average)	2 (Above Average)	2 (Above Average)	2 (Above Average)	3 (Average)	2 (Above Average)
2021-07-26 23:28:00			Student	2 (Above Average)	3 (Average)	3 (Average)	2 (Above Average)	4 (Below average )	2 (Above Average)	4 (Below average )	2 (Above Average)	5 (Worst)	2 (Above Average)	2 (Above Average)	2 (Above Average)
2021-07-26 23:32:00			Student	1 (Best)	1 (Best)	2 (Above Average)	1 (Best)	2 (Above Average)	1 (Best)	2 (Above Average)	1 (Best)	2 (Above Average)	1 (Best)	2 (Above Average)	1 (Best)
2021-07-27 00:16:00			Industrial Engineer	2 (Above Average)	2 (Above Average)	3 (Average)	2 (Above Average)	2 (Above Average)	4 (Below average )	2 (Above Average)	1 (Best)	1 (Best)	2 (Above Average)	3 (Average)	2 (Above Average)
2021-07-27 01:05:00			Industrial Engineer	2 (Above Average)	3 (Average)	3 (Average)	2 (Above Average)	3 (Average)	4 (Below average )	1 (Best)	1 (Best)	1 (Best)	2 (Above Average)	2 (Above Average)	2 (Above Average)
2021-07-27 01:19:00			Industrial Engineer	2 (Above Average)	3 (Average)	2 (Above Average)	2 (Above Average)	4 (Below average )	3 (Average)	2 (Above Average)	2 (Above Average)	2 (Above Average)	3 (Average)	2 (Above Average)	2 (Above Average)
2021-07-27 01:29:00			Industrial Engineer	1 (Best)	1 (Best)	2 (Above Average)	2 (Above Average)	3 (Average)	3 (Average)	2 (Above Average)	2 (Above Average)	2 (Above Average)	3 (Average)	2 (Above Average)	2 (Above Average)
2021-07-27 01:36:00			Student	3 (Average)	4 (Below average )	3 (Average)	2 (Above Average)	4 (Below average )	3 (Average)	3 (Average)	4 (Below average )	2 (Above Average)	2 (Above Average)	2 (Above Average)	2 (Above Average)
2021-07-27 01:50:00			Student	2 (Above Average)	1 (Best)	2 (Above Average)	1 (Best)	3 (Average)	1 (Best)	2 (Above Average)	3 (Average)	4 (Below average )	1 (Best)	1 (Best)	1 (Best)
2021-07-27 01:52:00			Student	3 (Average)	3 (Average)	4 (Below average )	2 (Above Average)	1 (Best)	3 (Average)	3 (Average)	3 (Average)	4 (Below average )	3 (Average)	2 (Above Average)	3 (Average)
2021-07-27 01:55:00			Industrial Engineer	2 (Above Average)	2 (Above Average)	3 (Average)	3 (Average)	2 (Above Average)	2 (Above Average)	1 (Best)	3 (Average)	1 (Best)	1 (Best)	2 (Above Average)	2 (Above Average)
2021-07-27 01:56:00			Student	2 (Above Average)	2 (Above Average)	2 (Above Average)	2 (Above Average)	2 (Above Average)	2 (Above Average)	3 (Average)	4 (Below average )	3 (Average)	2 (Above Average)	2 (Above Average)	2 (Above Average)
2021-07-27 02:03:00			Industrial Engineer	2 (Above Average)	2 (Above Average)	4 (Below average )	3 (Average)	2 (Above Average)	3 (Average)	3 (Average)	2 (Above Average)	1 (Best)	2 (Above Average)	3 (Average)	3 (Average)
2021-07-27 02:34:00			Student	4 (Below average )	4 (Below average )	3 (Average)	4 (Below average )	2 (Above Average)	4 (Below average )	4 (Below average )	3 (Average)	5 (Worst)	5 (Worst)	1 (Best)	1 (Best)
2021-07-27 04:58:00			Industrial Engineer	1 (Best)	1 (Best)	2 (Above Average)	2 (Above Average)	1 (Best)	1 (Best)	2 (Above Average)	1 (Best)	2 (Above Average)	3 (Average)	1 (Best)	1 (Best)
2021-07-27 06:53:00			Student	3 (Average)	3 (Average)	3 (Average)	3 (Average)	3 (Average)	3 (Average)	3 (Average)	3 (Average)	2 (Above Average)	3 (Average)	3 (Average)	2 (Above Average)
2021-07-27 08:03:00			Industrial Engineer	2 (Above Average)	3 (Average)	4 (Below average )	2 (Above Average)	3 (Average)	2 (Above Average)	2 (Above Average)	2 (Above Average)	1 (Best)	3 (Average)	2 (Above Average)	2 (Above Average)
2021-07-27 08:06:00			Student	3 (Average)	3 (Average)	3 (Average)	2 (Above Average)	2 (Above Average)	2 (Above Average)	4 (Below average )	2 (Above Average)	4 (Below average )	3 (Average)	2 (Above Average)	2 (Above Average)
2021-07-27 08:17:00			Student	3 (Average)	3 (Average)	3 (Average)	3 (Average)	3 (Average)	3 (Average)	3 (Average)	3 (Average)	3 (Average)	3 (Average)	3 (Average)	3 (Average)
2021-07-27 08:33:00			Student	4 (Below average )	3 (Average)	3 (Average)	2 (Above Average)	2 (Above Average)	2 (Above Average)	2 (Above Average)	3 (Average)	2 (Above Average)	1 (Best)	3 (Average)	3 (Average)
2021-07-27 08:38:00			Student	2 (Above Average)	2 (Above Average)	3 (Average)	4 (Below average )	3 (Average)	2 (Above Average)	3 (Average)	4 (Below average )	2 (Above Average)	3 (Average)	3 (Average)	3 (Average)
2021-07-27 08:39:00			Industrial Engineer	1 (Best)	1 (Best)	1 (Best)	1 (Best)	1 (Best)	1 (Best)	1 (Best)	1 (Best)	1 (Best)	1 (Best)	1 (Best)	1 (Best)
2021-07-27 09:01:00			Industrial Engineer	3 (Average)	3 (Average)	3 (Average)	3 (Average)	3 (Average)	3 (Average)	3 (Average)	3 (Average)	3 (Average)	3 (Average)	3 (Average)	3 (Average)
2021-07-27 09:19:00			Industrial Engineer	2 (Above Average)	2 (Above Average)	3 (Average)	2 (Above Average)	2 (Above Average)	2 (Above Average)	2 (Above Average)	2 (Above Average)	1 (Best)	2 (Above Average)	1 (Best)	2 (Above Average)
2021-07-27 09:54:00			Student	2 (Above Average)	3 (Average)	2 (Above Average)	2 (Above Average)	3 (Average)	2 (Above Average)	2 (Above Average)	3 (Average)	2 (Above Average)	2 (Above Average)	1 (Best)	2 (Above Average)
2021-07-27 10:01:00			Student	2 (Above Average)	2 (Above Average)	2 (Above Average)	2 (Above Average)	2 (Above Average)	2 (Above Average)	2 (Above Average)	2 (Above Average)	2 (Above Average)	2 (Above Average)	2 (Above Average)	2 (Above Average)
2021-07-27 10:29:00			Student	1 (Best)	1 (Best)	1 (Best)	1 (Best)	1 (Best)	1 (Best)	1 (Best)	1 (Best)	1 (Best)	1 (Best)	1 (Best)	1 (Best)
2021-07-27 10:37:00			Industrial Engineer	2 (Above Average)	3 (Average)	3 (Average)	1 (Best)	2 (Above Average)	3 (Average)	2 (Above Average)	1 (Best)	5 (Worst)	3 (Average)	2 (Above Average)	2 (Above Average)
2021-07-27 10:42:00			Student	3 (Average)	2 (Above Average)	3 (Average)	2 (Above Average)	2 (Above Average)	2 (Above Average)	2 (Above Average)	2 (Above Average)	2 (Above Average)	2 (Above Average)	2 (Above Average)	2 (Above Average)
2021-07-27 10:44:00			Student	3 (Average)	3 (Average)	2 (Above Average)	3 (Average)	4 (Below average )	2 (Above Average)	4 (Below average )	3 (Average)	4 (Below average )	3 (Average)	2 (Above Average)	4 (Below average )
2021-07-27 11:05:00			Student	2 (Above Average)	2 (Above Average)	2 (Above Average)	3 (Average)	2 (Above Average)	1 (Best)	3 (Average)	4 (Below average )	1 (Best)	3 (Average)	1 (Best)	2 (Above Average)
2021-07-27 11:47:00			Industrial Engineer	4 (Below average )	3 (Average)	4 (Below average )	2 (Above Average)	2 (Above Average)	2 (Above Average)	2 (Above Average)	2 (Above Average)	2 (Above Average)	4 (Below average )	3 (Average)	2 (Above Average)
2021-07-27 11:55:00			Industrial Engineer	3 (Average)	3 (Average)	3 (Average)	2 (Above Average)	2 (Above Average)	2 (Above Average)	2 (Above Average)	3 (Average)	3 (Average)	2 (Above Average)	2 (Above Average)	2 (Above Average)
2021-07-27 12:23:00			Industrial Engineer	2 (Above Average)	2 (Above Average)	3 (Average)	2 (Above Average)	3 (Average)	2 (Above Average)	2 (Above Average)	3 (Average)	2 (Above Average)	2 (Above Average)	3 (Average)	3 (Average)
2021-07-27 12:23:00			Student	2 (Above Average)	3 (Average)	1 (Best)	2 (Above Average)	3 (Average)	2 (Above Average)	2 (Above Average)	3 (Average)	1 (Best)	2 (Above Average)	2 (Above Average)	1 (Best)
2021-07-27 14:31:00			Student	3 (Average)	3 (Average)	3 (Average)	2 (Above Average)	2 (Above Average)	2 (Above Average)	3 (Average)	3 (Average)	2 (Above Average)	3 (Average)	2 (Above Average)	3 (Average)
